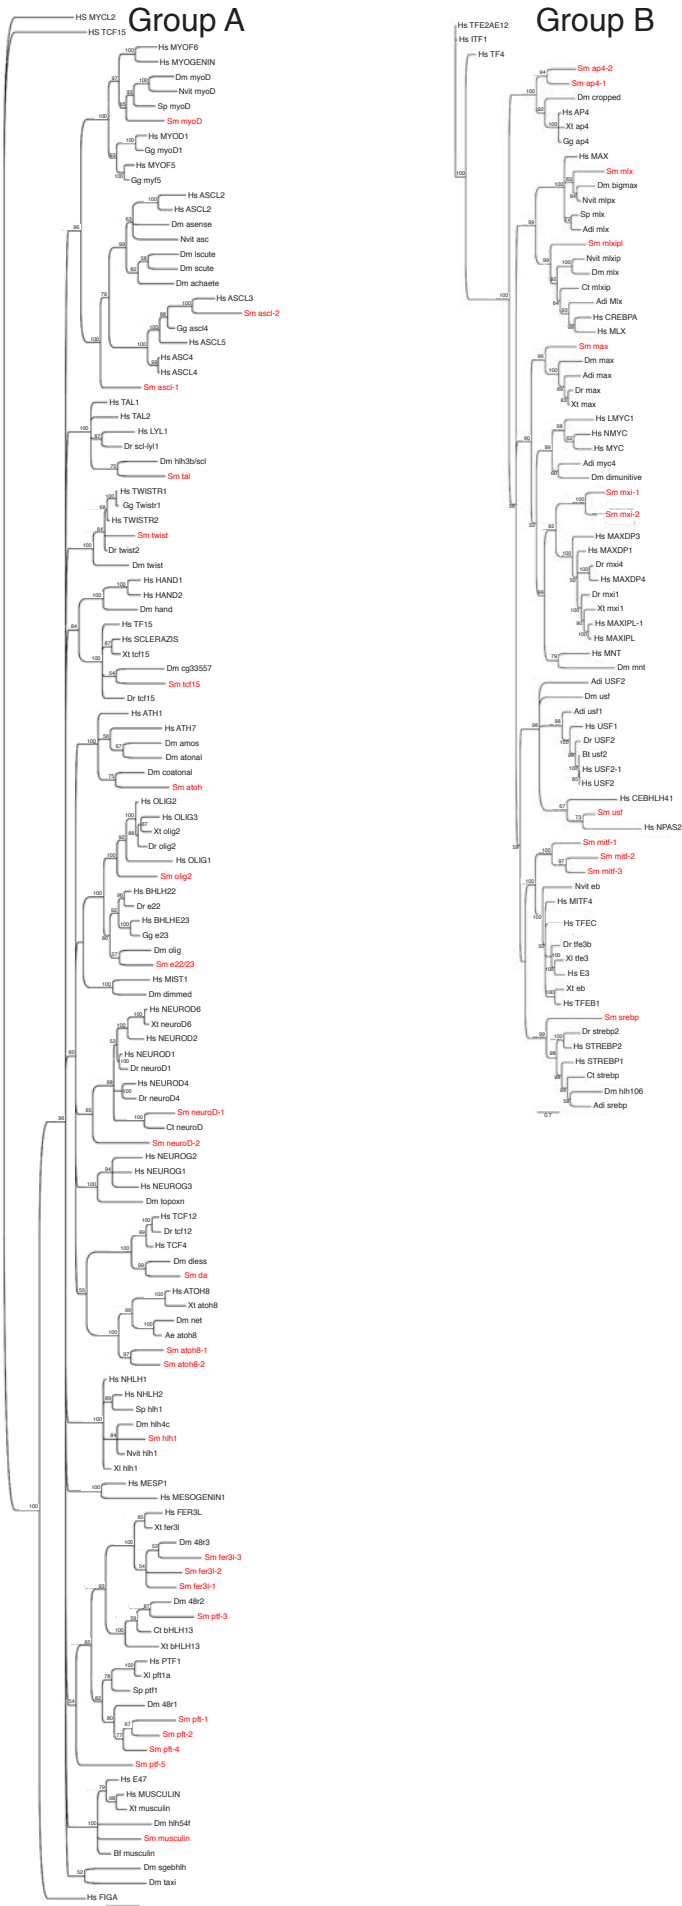

**Fig. S1: Bayesian Phylogeny of Groups A and B bHLH transcription factor homologs.** Protein sequences used in the phylogenies were obtained from the NCBI Entrez protein database or directly from the genome sequencing projects of included organisms. Sequences were aligned using T-Coffee (Notredame et al., 2000) and the program Geneious (www.geneious.com) was used for Bayesian analyses with the following settings: 1 million replicates, WAG substitution model, 4 heated chains, 25% burnin, and subsample frequency of 1000. Consensus tree images were saved through Geneious and then manipulated in Adobe Photoshop. Only bootstrap values over 50 are shown. Species used: *Adi*=*Acropora digitifera*; *Ag*=*Anopheles gambiae*; *Bf*=*Branchiostoma floridae*; *Bt*=*Bos taurus*; *Ct*=*Capitella teleta*; *Dm*=*Drosophila melanogaster*; *Dr*=*Danio rerio*; *Gg*=*Gallus gallus*; *Hs*=*Homo sapiens*; *Nvit*=*Nematostella vectensis*; *Sp*=*Strongylocentrotus purpuratus*; *Sm*=*Schmidtea mediterranea*; *Xl*=*Xenopus laevis*; *Xt*=*Xenopus tropicalis*. *S. mediterranea* homologs are in red fonts.

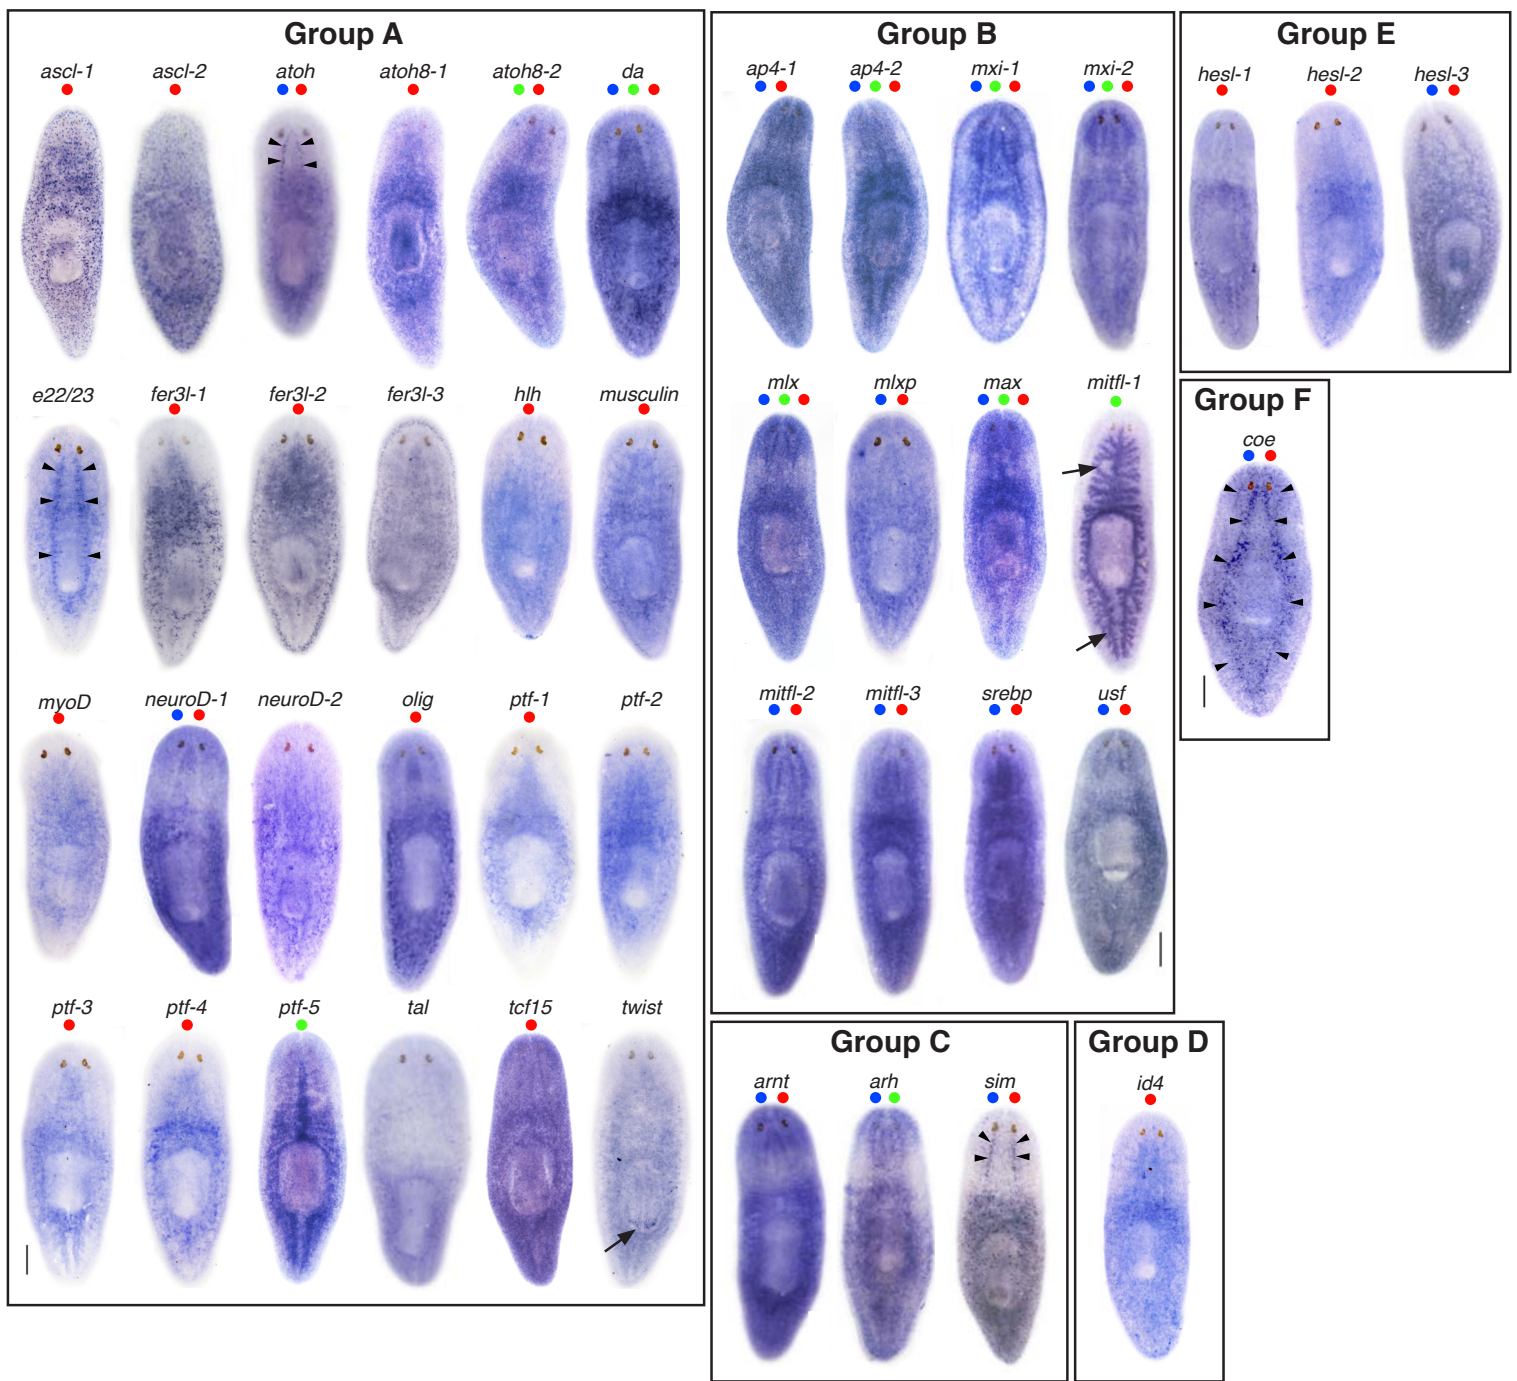

**Fig. S2: Expression analysis of bHLH genes in *S. mediterranea*.** Intact animals were processed for whole-mount in situ hybridization to bHLH genes. Gene names are indicated above each animal. bHLHs were expressed in a wide range of cells and tissues. *ascl-1* and *ascl-2* were expressed in a punctate pattern throughout the mesenchyme. *atoh*, *e22/23*, *sim*, and *coe* were expressed in distinct cells in the CNS (black arrowheads). *mitfl-1* and *twist* were exclusively detected in the intestine and pharynx (black arrows). Many bHLH genes, including *arnt*, *da*, *ap4-1*, *max* and *srebp*, were detected ubiquitously throughout the animal. *fer3l-1*, *fer3l-2*, and *fer3l-3* exhibited related expression patterns with *fer3l-1* expression detected in the interior mesenchyme (stem cell-like) and *fer3l-2* and *fer3l-3* detected more exteriorly (similar to a post-mitotic progeny pattern). No definitive expression pattern was observed for *neuroD-2*. The expression of genes in planarian stem cells and immediate progeny is characterized by parenchymal (mesenchymal) staining ranging from punctate expression in stem cell or progeny to diffuse expression throughout the animal and  $\gamma$ -irradiation sensitive. As expected, most bHLHs displayed reduced expression following  $\gamma$ -irradiation (see Table S1). Blue and green dots above the animals denote expression in the CNS and intestine, respectively; red dots denote genes that were  $\gamma$ -irradiation sensitive. Genes were categorized in bHLH Groups A-F based on their homology. Scale bars = 200  $\mu$ m.



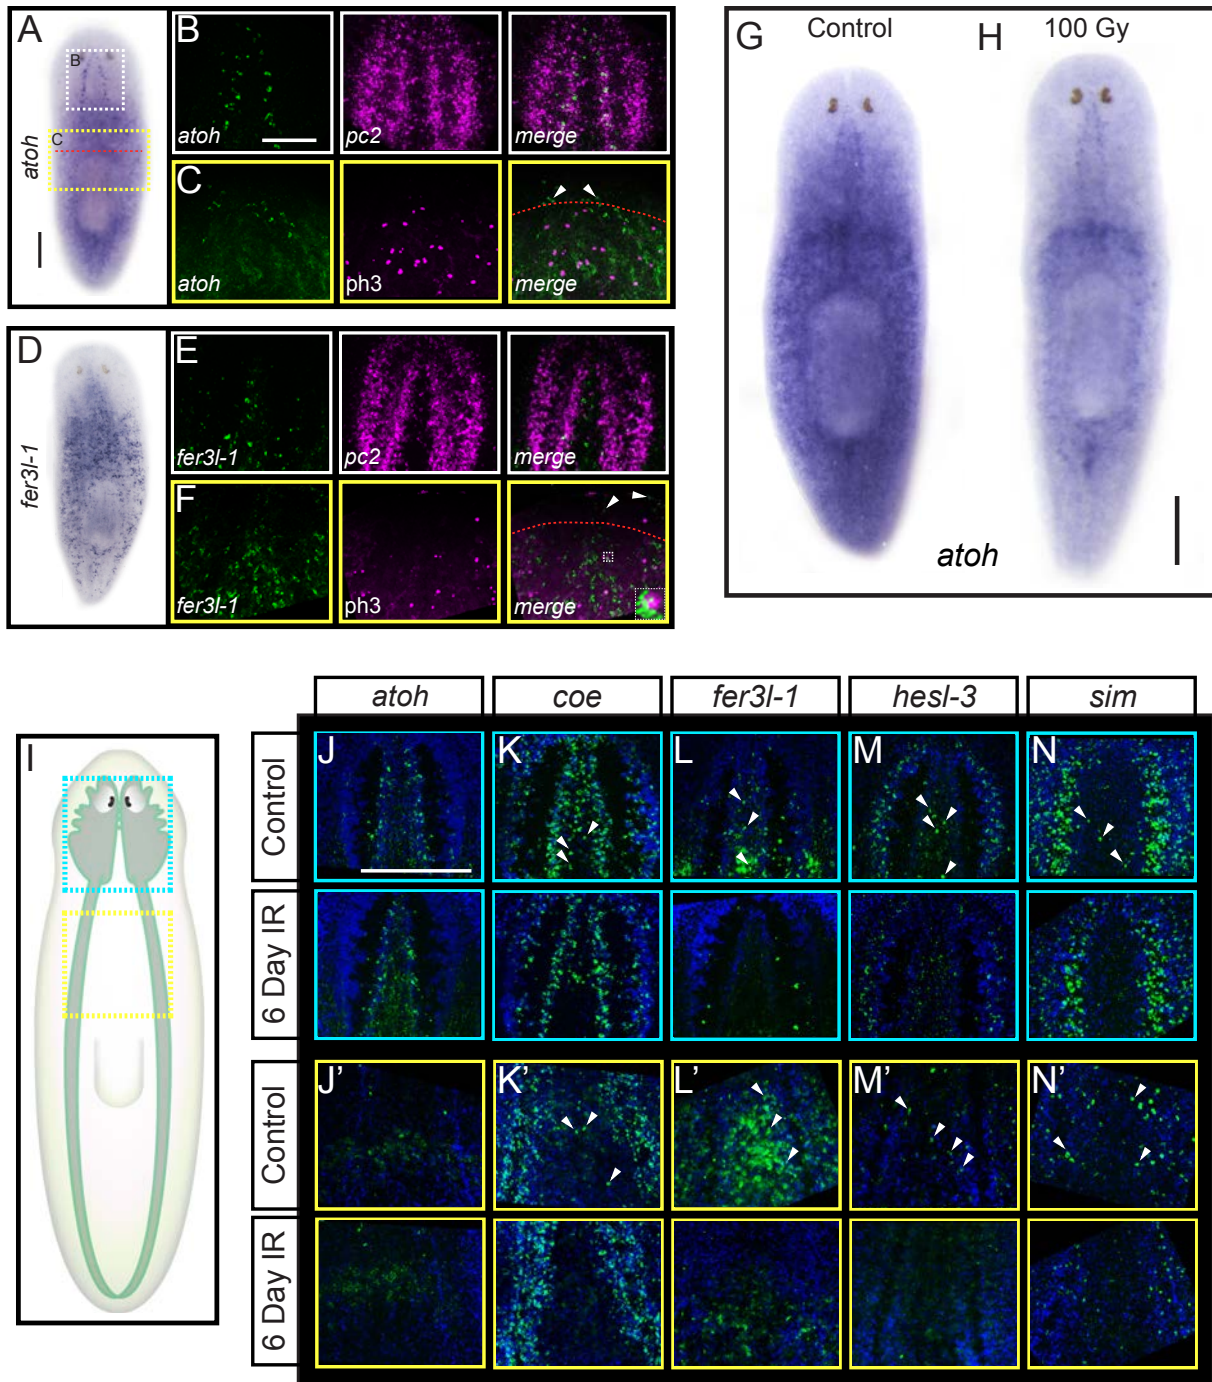

**Fig. S3: bHLH genes are expressed in  $\gamma$ -irradiation-sensitive populations near the CNS and stem cell compartment.** (A) Expression pattern of *atoh*. Dashed boxes indicate zoom area of the brain or regeneration blastema shown in B and C, respectively. Dashed red line indicates site of amputation. (B) FISH to *atoh* (green) and *pc2* (magenta). (C) FISH to *atoh* counterstained with anti-phosphohistone-H3 (ph3) to label mitotic cells in 3 day regenerates. Arrowheads denote *atoh*<sup>+</sup> cells within the blastema. (D-F) show similar analysis for *fer3l-1*. White dashed box in F highlights a bHLH/ph3-positive cells shown at high magnification within the merged image inset. (G and H) WISH to *atoh* in controls or animals 6 days post-irradiation (100 Gy). (I) Cartoon depicting the planarian CNS; blue (head) and yellow (pre-pharyngeal) boxes denote areas of the animal imaged in J-N and J'-N', respectively. (J-N') Control and  $\gamma$ -irradiated animals processed for fluorescent in situ hybridization to *atoh*, *coe*, *fer3l-1*, *hesl-3*, and *sim*, and counterstained with DAPI. Arrowheads denote representative cell populations lost following  $\gamma$ -irradiation. Scale bars = 200  $\mu$ m.

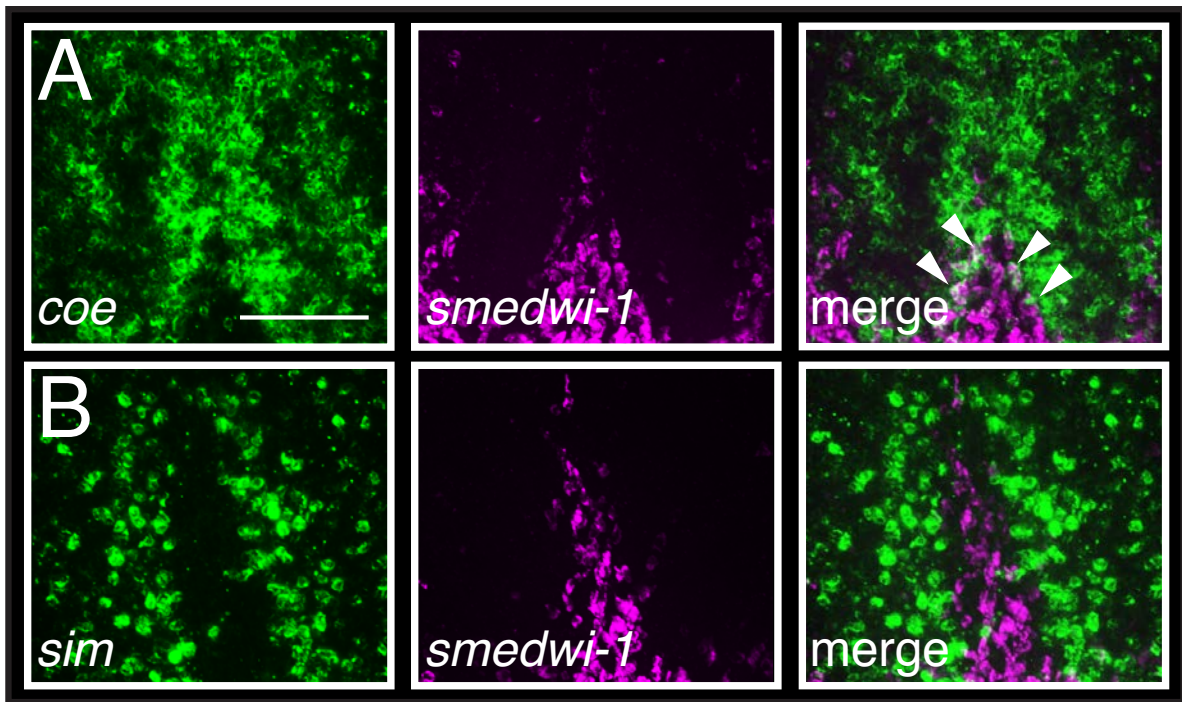

**Fig. S4:** *coe* and *sim* are not co-expressed with *smedwi-1* in the anterior region of the cephalic ganglia. (A-B) Representative images from the head region of animals processed for double-fluorescent in situ hybridization to *coe* or *sim* and *smedwi-1*. White arrows point to *coe*<sup>+</sup>/*smedwi-1*<sup>+</sup> cells. Scale bar in A = 100 μm.

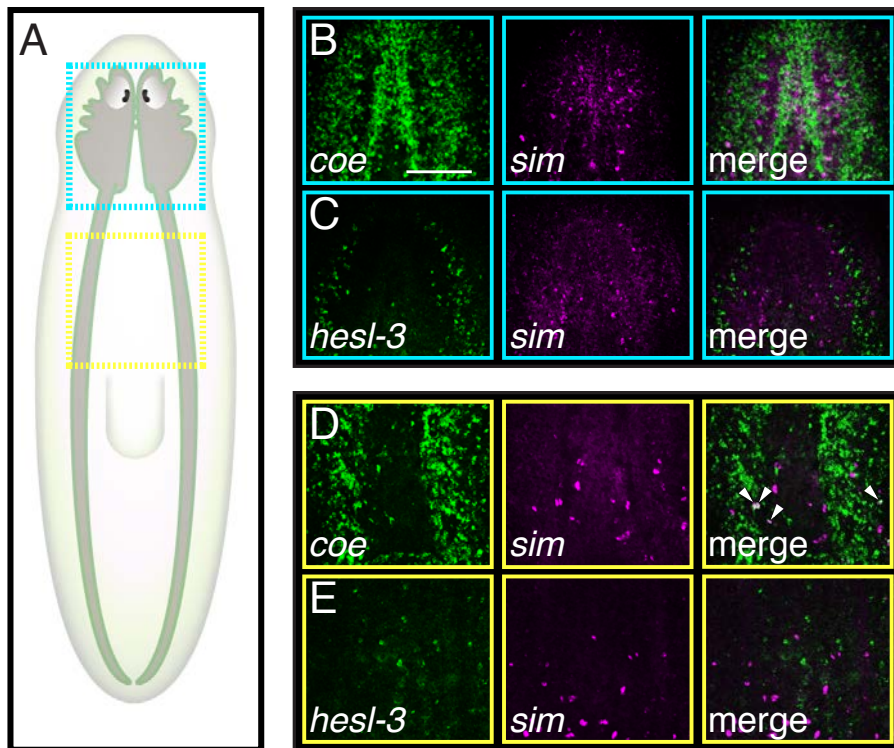

**Fig. S5:** *coe* and *sim* are co-expressed in cells in the pre-pharyngeal area. (A) Cartoon depicting the planarian CNS. Blue (head) and yellow (pre-pharyngeal) boxes denote the region of the animal imaged in B-D, respectively. (B-E) Images of the brain region of animals processed for double-fluorescent in situ hybridization to *coe* and *sim* or *hesl-3* and *sim*. Scale bar in B = 100 μm.

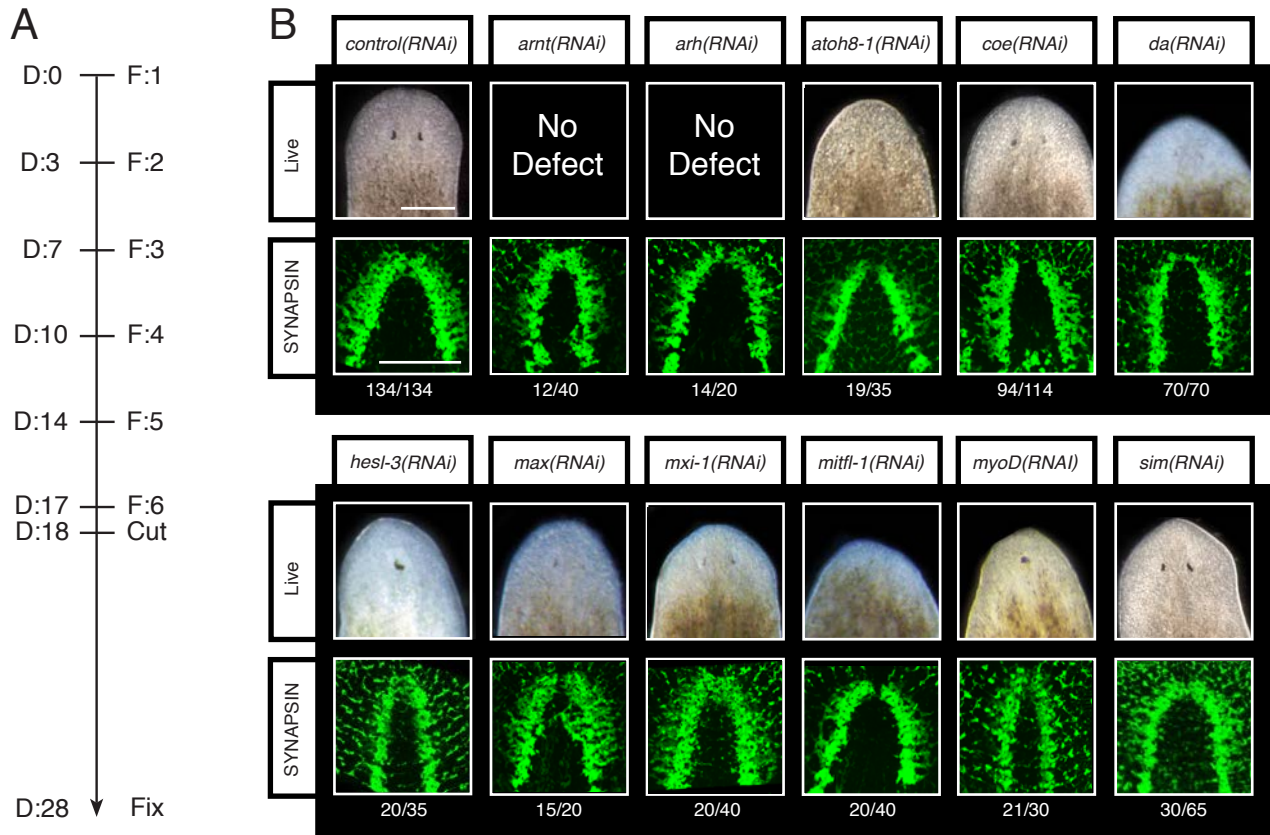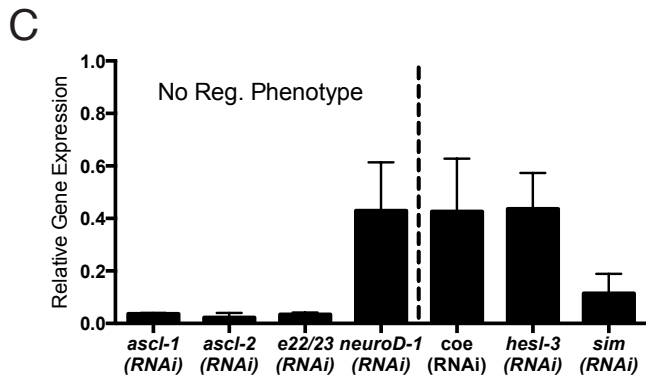

**Fig. S6: bHLH RNAi screen for defects in CNS regeneration.** (A) Experimental design for RNAi screen; D and F denote days and number of bacterial feedings, respectively. (B) Summary of RNAi phenotypes following bHLH knockdowns. Images shown are of 10-day regenerates. Numbers below images refer to the number of animals with an observable regeneration defect. (C) Quantitative real-time PCR measurements of relative mRNA expression after RNAi knockdown of selected bHLH genes. *ascl-1*, *ascl-2*, *e22/23* and *neuroD-1* did not result in a regeneration phenotype following RNAi. Scale bars = 200  $\mu$ m



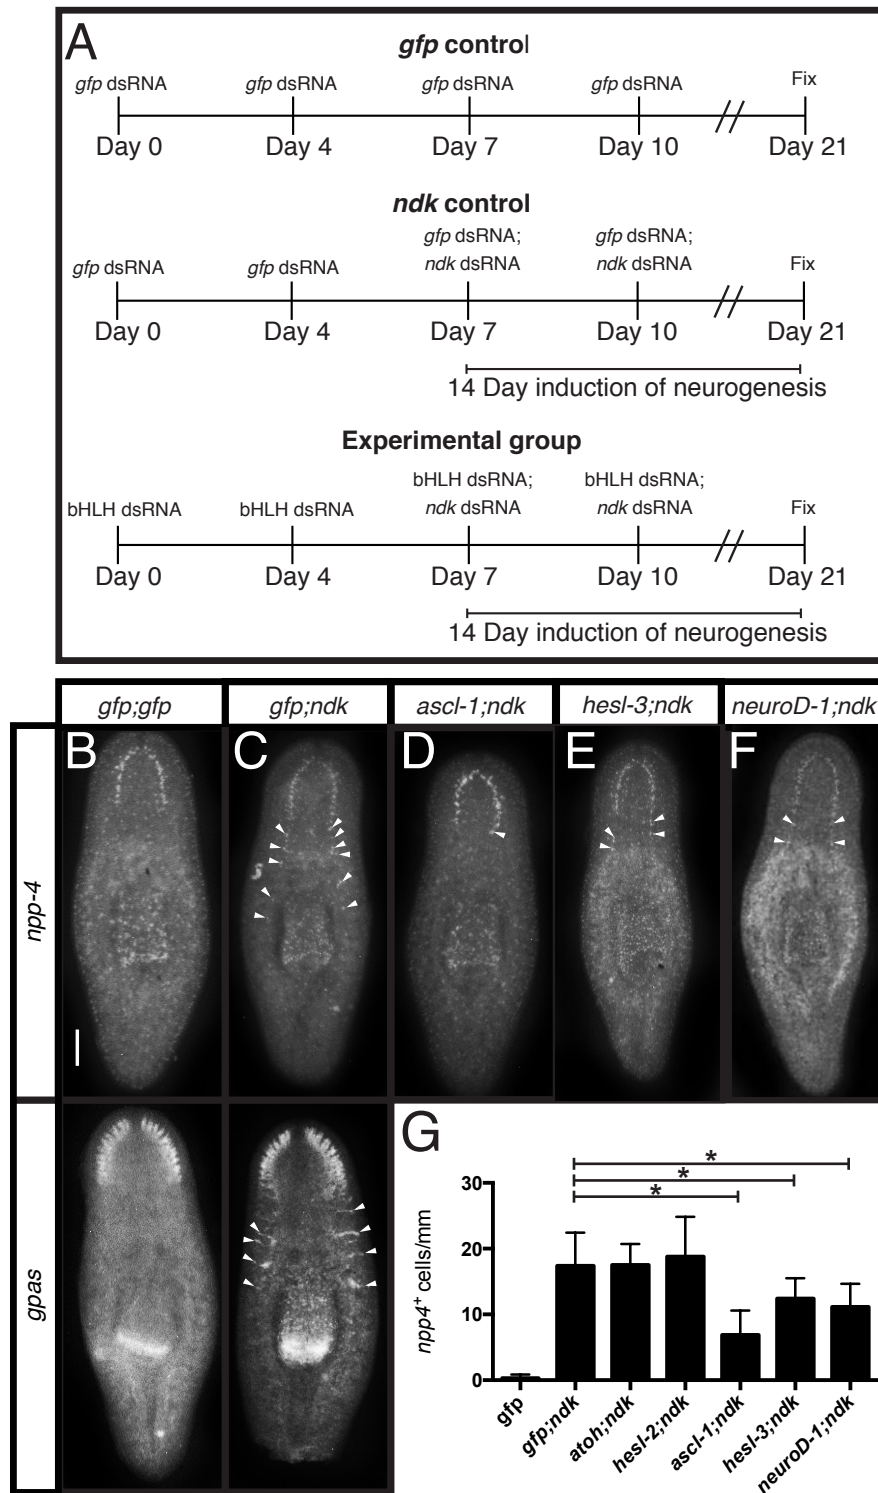

**Fig. S7. *ascl-1*, *hesl-3*, and *neuroD-1* suppress ectopic formation of *npp-4<sup>+</sup>* cells when co-silenced with *ndk*.** (A) Schematic of RNAi-based suppression assay. For double knockdown experiments, bacterial pellets containing dsRNA for each gene were mixed 1:1. For select bHLH and *ndk* co-silencing experiments, planarians were fed dsRNA four times over two weeks. The first two RNAi feedings contained *bHLH* dsRNA and the final two RNAi treatments contained both *bHLH* and *ndk* dsRNA. (B-F) *gfp;gfp(RNAi)*, *gfp;ndk(RNAi)*, *ascl-1;ndk(RNAi)*, *hesl-3;ndk(RNAi)*, and *neuroD-1;ndk(RNAi)* animals were processed for FISH to *npp-4* or *gpas*. (G) Quantification of ectopic *npp-4<sup>+</sup>* cells (arrowheads in B-F of top row;  $n > 9$  animals per group); neurons were normalized by the length of the animal (mm). Asterisks denote a significant reduction of cells when compared with *gfp;ndk(RNAi)* animals ( $p < 0.05$ , Student's t-test). The expansion of *gpas* after *ndk* RNAi (arrowheads in B and C of bottom row) was not affected after *bHLH* knockdowns. Scale bar = 200  $\mu$ m.

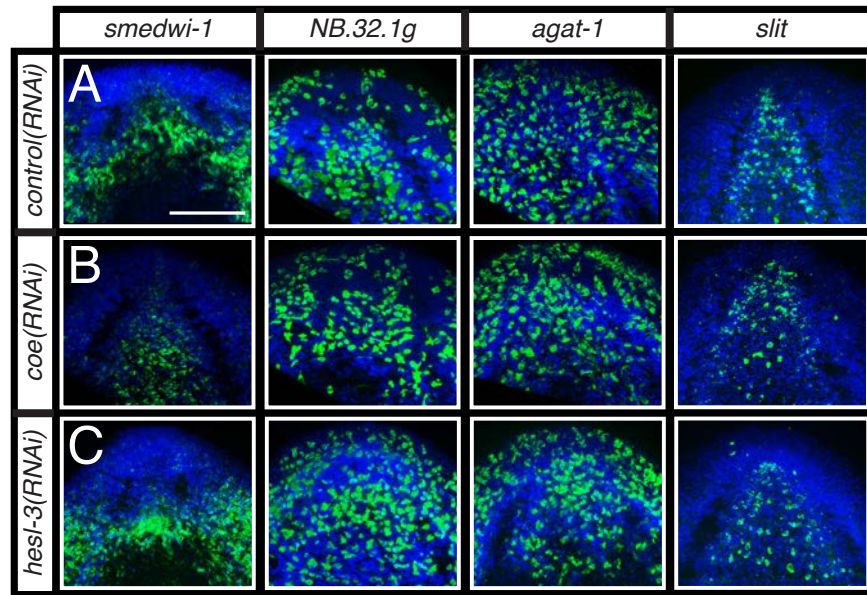

**Fig. S8: *coe* and *hesl-3* RNAi phenotypes are not due to a loss of the stem cells, progeny, or midline signals.** (A-C) RNAi treated animals were amputated, allowed to regenerate for 5 days, and then processed for fluorescent in situ hybridization to *smedwi-1*, *NB.32.1g*, *agat-1*, or *slit* and counterstained with DAPI. Scale bar = 100  $\mu$ m.

**Movie 1.** *control(RNAi)* intact planarians display the stereotypical light avoidance response and glide away from the center of the petri dish.

**Movie 2.** *coe(RNAi)* intact animals fail to display a robust response to light. Some animals do not show normal locomotion behaviors and appear to be immobilized.

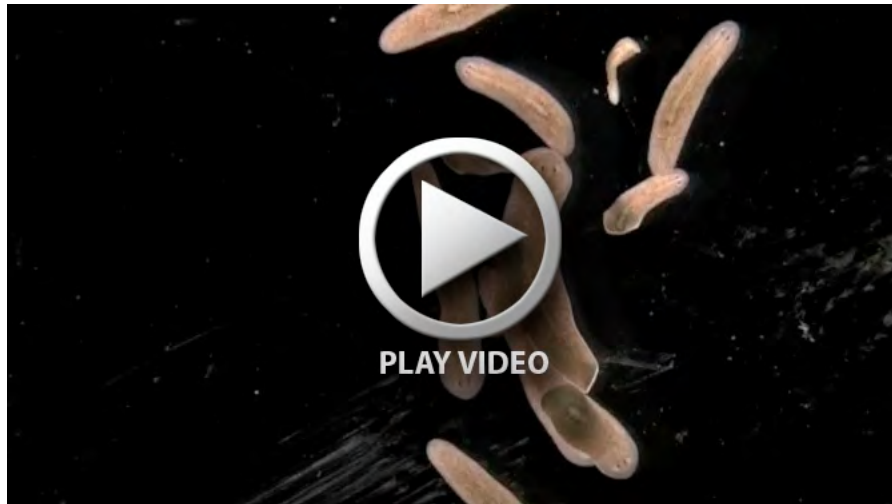

**Movie 1**

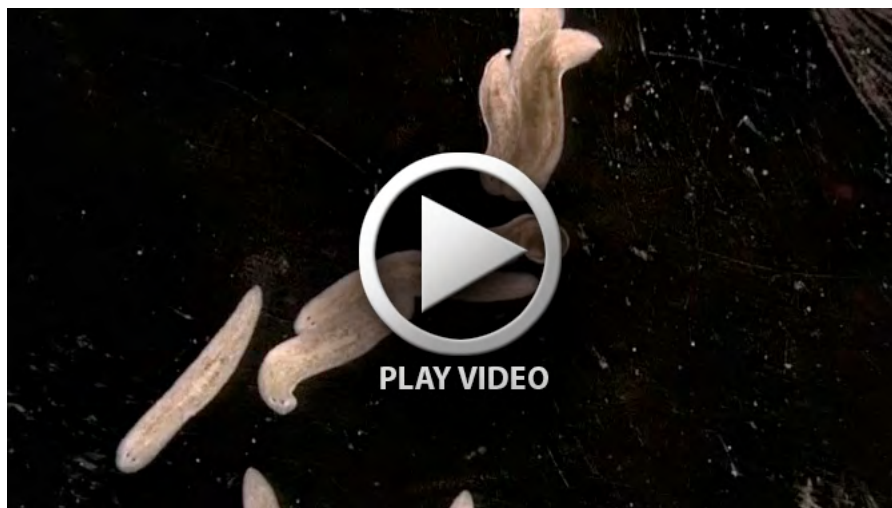

**Movie 2**



Table S1. Summary of bHLH homologs in *S. mediterranea* and their expression patterns determined from published RNA-seq data and in situ hybridization.

| Gene Name                                                                   | Top Hit Accession | Top Hit Gene Name | Top Hit Evalue | Category | cRPKM SC * | cRPKM Prog # | cRPKM Diff # | log2(X1/Xins) # | log2(X1/X2) # | log2(X2/Xins) # | Category | Stem Cells/Progeny | CNS | Pharynx | Intestine | Epidermis | Mesenchyme |
|-----------------------------------------------------------------------------|-------------------|-------------------|----------------|----------|------------|--------------|--------------|-----------------|---------------|-----------------|----------|--------------------|-----|---------|-----------|-----------|------------|
| <i>Smed-achaete scute like-1 (ascl-1)</i>                                   | Q6XD76            | ASCL4_HUMAN       | 4.00E-11       | A        | 19.03      | 34.14        | 40.22        | -2.811263821    | -0.481553859  | -2.329709962    | 6        | Yes                | No  | No      | No        | No        | Yes        |
| <i>Smed-achaete scute like-2 (ascl-2)</i>                                   | Q9NQ33            | ASCL3_HUMAN       | 7.00E-19       | A        | 1.17       | 2.77         | 3.71         | 0.763645015     | 0.596177444   | 0.167467571     | 2        | Yes                | No  | No      | No        | No        | Yes        |
| <i>Smed-activating enhancer binding protein-like 4-1 (ap4-1)</i>            | Q01664            | TFAP4_HUMAN       | 1.00E-15       | B        | 4.22       | 7.75         | 7.75         | -1.723158391    | -0.159717879  | -1.563440512    | 6        | Yes                | Yes | Yes     | No        | No        | Yes        |
| <i>Smed-activating enhancer binding protein-like 4-2 (ap4-2)</i>            | Q01664            | TFAP4_HUMAN       | 4.00E-15       | B        | 153.27     | 150.92       | 17.96        | 1.814102441     | 0.554289807   | 1.259812634     | 1        | Yes                | Yes | Yes     | Yes       | No        | Yes        |
| <i>Smed-aryl hydrocarbon receptor (ahr)</i>                                 | Q95LD9            | AHR_DELLE         | 1.00E-95       | C        | 0.75       | 10.49        | 7.26         | -1.699145616    | -1.970169379  | 0.271023763     | 3        | No                 | Yes | No      | No        | Yes       | Yes        |
| <i>Smed-aryl hydrocarbon receptor nuclear translocator-like (arnt)</i>      | O15945            | ARNT_DROME        | 2.00E-149      | C        | 31.88      | 58.94        | 10.93        | 2.222109911     | 0.722122834   | 1.499987077     | 1        | Yes                | Yes | No      | No        | No        | Yes        |
| <i>Smed-atonal homolog (atoh)</i>                                           | P48985            | ATOH1_MOUSE       | 3.00E-15       | A        | NA         | NA           | NA           | 2.026679421     | -2.047678746  | 4.074358167     | 3        | Yes                | Yes | No      | No        | No        | Yes        |
| <i>Smed-atonal homolog 8-1 (atoh8-1)</i>                                    | Q99NA2            | ATOH8_MOUSE       | 8.00E-21       | A        | 9.74       | 9.03         | 6.23         | 1.723287277     | 0.225953792   | 1.497333485     | 1        | Yes                | No  | Yes     | No        | No        | Yes        |
| <i>Smed-atonal homolog 8-1 (atoh8-2)</i>                                    | Q99NA2            | ATOH8_MOUSE       | 2.00E-21       | A        | 8.19       | 16.3         | 5.1          | 0.289713827     | -0.110414501  | 0.400128328     | 3        | Yes                | No  | Yes     | Yes       | No        | Yes        |
| <i>Smed-basic helix-loop-helix family, member e22/23-like (e22/23)</i>      | Q8BGW3            | BHE23_MOUSE       | 1.00E-34       | A        | 0.93       | 2.17         | 17.47        | -4.017714699    | -4.003735398  | -0.0139793      | 5        | No                 | Yes | No      | No        | No        | Yes        |
| <i>Smed-collier (coe)</i>                                                   | Q63398            | COE1_RAT          | 0              | F        | 7.27       | 27.86        | 11.33        | 1.493145159     | -0.638989339  | 2.132134498     | 3        | Yes                | Yes | Yes     | No        | No        | Yes        |
| <i>Smed-daughterless (da)</i>                                               | P11420            | DA_DROME          | 3.00E-41       | A        | 53.33      | 49.7         | 19.05        | 2.52093294      | 1.485722114   | 1.035210826     | 1        | Yes                | Yes | Yes     | Yes       | Yes       | Yes        |
| <i>Smed-fer3l-1 (fer3l-1)</i>                                               | Q9VGJ5            | FER3_DROME        | 4.00E-31       | A        | 31.02      | 16.89        | 8.73         | 1.063803447     | 2.014550656   | -0.950747209    | 4        | Yes                | Yes | No      | No        | No        | No         |
| <i>Smed-fer3l-2 (fer3l-2)</i>                                               | Q923Z4            | FER3L_MOUSE       | 3.00E-26       | A        | 5.67       | 16.56        | 7.59         | -0.574771203    | 0.096606434   | -0.671377637    | 6        | No                 | No  | No      | No        | No        | Yes        |
| <i>Smed-fer3l-3 (fer3l-3)</i>                                               | Q9VGJ5            | FER3_DROME        | 1.00E-23       | A        | 0.08       | 0.6          | 11.46        | -5.399585334    | -1.725750651  | -3.673834683    | 5        | No                 | No  | No      | No        | No        | Yes        |
| <i>Smed-hairy and enhancer of split like-1 (hesl-1)</i>                     | Q00P32            | HES2_XENLA        | 2.00E-07       | E        | 3.81       | 0            | 0.09         | NA              | NA            | NA              | NA       | Yes                | Yes | No      | No        | No        | Yes        |
| <i>Smed-hairy and enhancer of split like-2 (hesl-2)</i>                     | Q03062            | HES5_RAT          | 4.00E-15       | E        | 4.51       | 0.92         | 0.96         | 3.274606934     | 2.844104957   | 0.430501977     | 2        | Yes                | No  | No      | No        | No        | Yes        |
| <i>Smed-hairy and enhancer of split like-3 (hesl-3)</i>                     | Q7KM13            | HEY_DROME         | 3.00E-30       | E        | 11.96      | 0.78         | 0.18         | 4.684890904     | 3.447034004   | 1.237856899     | 2        | Yes                | Yes | No      | No        | No        | Yes        |
| <i>Smed-helix-loop-helix 1 (hlh1)</i>                                       | Q02576            | HEN1_MOUSE        | 4.00E-25       | A        | NA         | NA           | NA           | NA              | NA            | NA              | NA       | Yes                | Yes | No      | No        | No        | Yes        |
| <i>Smed-inhibitor of DNA binding 4 (id4)</i>                                | P47928            | ID4_HUMAN         | 7.00E-13       | D        | 7.7        | 8.45         | 17.52        | 0.102628274     | -1.151843339  | 1.254471613     | 3        | Yes                | Yes | No      | No        | No        | Yes        |
| <i>Smed-max-interactor-1 (mxl-1)</i>                                        | P50538            | MAD1_MOUSE        | 6.00E-07       | B        | 14.78      | 31.8         | 35.8         | -0.057960799    | -0.965995962  | 0.908035162     | 3        | Yes                | Yes | Yes     | Yes       | No        | Yes        |
| <i>Smed-max-interactor-2 (mxl-2)</i>                                        | P50541            | MXI1_DANRE        | 2.00E-06       | B        | 5.62       | 13.45        | 48.55        | -1.57110712     | -0.895675653  | -0.675431468    | 5        | Yes                | Yes | Yes     | Yes       | No        | Yes        |
| <i>Smed-max-like protein x (mlx)</i>                                        | Q9UH92            | MLX_HUMAN         | 4.00E-33       | B        | 100.4      | 142.72       | 48.91        | 1.290308875     | 0.461109763   | 0.829199113     | 1        | Yes                | Yes | Yes     | Yes       | No        | Yes        |
| <i>Smed-microphthalmia-associated transcription factor like-1 (mitf1-1)</i> | Q08874            | MITF_MOUSE        | 5.00E-12       | B        | 1.21       | 2.12         | 17.32        | -3.793499542    | -1.403822556  | -2.389676985    | 5        | No                 | No  | No      | No        | No        | No         |
| <i>Smed-microphthalmia-associated transcription factor like-2 (mitf1-2)</i> | Q6XBT4            | USF1_BOVIN        | 1.00E-09       | B        | 19.43      | 37.69        | 19.44        | 0.77606873      | 0.36519556    | 0.41087317      | 1        | Yes                | Yes | No      | No        | No        | Yes        |
| <i>Smed-microphthalmia-associated transcription factor like-3 (mitf1-3)</i> | P19484            | TFEB_HUMAN        | 7.00E-08       | B        | 21.67      | 8.28         | 10.94        | 1.528466439     | 1.822857224   | -0.294390785    | 2        | Yes                | Yes | No      | No        | No        | Yes        |
| <i>Smed-mlx interacting protein-like (mlxipl)</i>                           | Q99MZ3            | MLXPL_MOUSE       | 5.00E-27       | B        | 9.43       | 19.65        | 15.04        | -0.15075684     | -0.033276976  | -0.117479864    | 6        | Yes                | Yes | No      | No        | No        | Yes        |
| <i>Smed-musculin</i>                                                        | A8E5T6            | TCF21_XENTR       | 1.00E-20       | A        | 5.1        | 0.63         | 0.59         | NA              | NA            | NA              | NA       | Yes                | Yes | No      | No        | No        | Yes        |
| <i>Smed-MYC associated factor X (max)</i>                                   | P52164            | MAX_RAT           | 2.00E-16       | B        | 71.58      | 160.14       | 56.55        | 1.136004411     | -0.171197368  | 1.30720178      | 1        | Yes                | Yes | Yes     | Yes       | Yes       | Yes        |
| <i>Smed-myogenic differentiation (myoD)</i>                                 | Q91154            | MYF5_NOTVI        | 2.00E-39       | A        | 12.6       | 11.04        | 14.73        | 1.187144093     | 1.071515453   | 0.11562864      | 2        | Yes                | No  | No      | No        | No        | Yes        |
| <i>Smed-neurogenic differentiation-1 (neuroD-1)</i>                         | Q6NYU3            | NDF6A_DANRE       | 9.00E-41       | A        | 12.21      | 2.97         | 0.83         | 3.693436013     | 2.125430512   | 1.568005501     | 1        | Yes                | Yes | No      | No        | No        | Yes        |
| <i>Smed-neurogenic differentiation-2 (neuroD-2)</i>                         | Q9HD90            | NDF4_HUMAN        | 4.00E-11       | A        | 2.64       | 1.22         | 2.03         | -0.422627981    | -1.837809158  | 1.415181178     | 3        | NA                 | NA  | NA      | NA        | NA        | NA         |
| <i>Smed-oligodendrocyte lineage transcription factor (olig)</i>             | Q90XB3            | OLIG2_CHICK       | 2.00E-30       | A        | 8.2        | 0.38         | 0.22         | NA              | NA            | NA              | NA       | Yes                | No  | No      | No        | No        | Yes        |
| <i>Smed-pancreas specific transcription factor-1 (pf1)</i>                  | Q7RIS3            | PTF1A_HUMAN       | 7.00E-26       | A        | 2.5        | 0.22         | 2.2          | NA              | NA            | NA              | NA       | Yes                | No  | No      | No        | No        | Yes        |
| <i>Smed-pancreas specific transcription factor-2 (pf2)</i>                  | Q4ZHW1            | PTF1A_XENLA       | 9.00E-33       | A        | 0.21       | 0.39         | 2            | NA              | NA            | NA              | NA       | No                 | No  | No      | No        | No        | Yes        |
| <i>Smed-pancreas specific transcription factor-3 (pf3)</i>                  | Q20561            | HLH13_CAEL        | 8.00E-24       | A        | 0.26       | 0            | 2.46         | NA              | NA            | NA              | NA       | Yes                | No  | No      | No        | No        | Yes        |
| <i>Smed-pancreas specific transcription factor-4 (pf4)</i>                  | Q4ZHW1            | PTF1A_XENLA       | 3.00E-33       | A        | 0.82       | 6.1          | 20.36        | -2.246339074    | -3.884949246  | 1.638610172     | 3        | Yes                | No  | No      | No        | No        | Yes        |
| <i>Smed-pancreas specific transcription factor-5 (pf5)</i>                  | Q8AW52            | ATOH7_DANRE       | 2.00E-12       | A        | 0.18       | 3.23         | 11.07        | -1.764733957    | -2.389883365  | 0.625149408     | 3        | No                 | No  | Yes     | Yes       | No        | Yes        |
| <i>Smed-single minded (sim)</i>                                             | A2T6X9            | SIM1_PANTR        | 6.00E-161      | C        | 14.74      | 6.15         | 2.52         | 4.884660416     | 2.869195938   | 2.015464478     | 1        | Yes                | Yes | Yes     | Yes       | No        | Yes        |
| <i>Smed-sterol regulatory element binding transcription factor (srebp)</i>  | A3KNA7            | SRBP2_DANRE       | 3.00E-15       | B        | 17.13      | 46.46        | 28.97        | 0.46831113      | -0.298806385  | 0.767117515     | 3        | Yes                | Yes | Yes     | No        | No        | Yes        |
| <i>Smed-T-cell acute lymphocytic leukemia (tal)</i>                         | P17542            | TAL1_HUMAN        | 9.00E-17       | A        | 0.23       | 3.69         | 6.45         | -4.330872584    | -5.062034039  | 0.731161455     | 3        | No                 | No  | No      | No        | No        | Yes        |
| <i>Smed-transcription factor 15 (tcf15)</i>                                 | P79782            | TCF15_CHICK       | 3.00E-23       | A        | 59.67      | 20.65        | 14.63        | 1.723522574     | 0.927041018   | 0.796481556     | 1        | Yes                | No  | Yes     | No        | No        | Yes        |
| <i>Smed-twist</i>                                                           | Q9D030            | TWST2_MOUSE       | 1.00E-32       | A        | 2.31       | 1.74         | 0.25         | 4.980875731     | 1.462910913   | 3.517964818     | 1        | No                 | No  | Yes     | No        | No        | Yes        |
| <i>Smed-upstream transcription factor (usf)</i>                             | Q15853            | USF2_HUMAN        | 1.00E-09       | B        | 32.3       | 32.87        | 30.57        | 1.168698426     | 0.706880908   | 0.461817517     | 1        | Yes                | Yes | No      | No        | No        | Yes        |

A = 24  
B = 12  
C = 3  
D = 1  
E = 3  
F = 1

\* Labbe et al. 2012

# Onal et al. 2012

35/43 in Stem Cells  
25/43 in CNS  
33/43 in Stem Cells or CNS  
23/43 in Stem Cells and CNS  
NA: Unable to detect by WISH

Table S2. Accession numbers and oligonucleotide sequences to clones used in this study.

| bHLH Clones                                                                 |                  |                                       |                                         |
|-----------------------------------------------------------------------------|------------------|---------------------------------------|-----------------------------------------|
| Gene Name                                                                   | Accession Number | Forward Primer                        | Reverse Primer                          |
| <i>Smed-achaete scute like-1 (ascl-1)</i>                                   | DN307058         | NA                                    | NA                                      |
| <i>Smed-achaete scute like-2 (ascl-2)</i>                                   | KF487091         | CCGCTCGAGTGGGTTGCTTATCCAGAAATG        | ATAAGAATGCGGCCGCGACTCGTCGATACTTGTCTTT   |
| <i>Smed-activating enhancer binding protein-like-4.1 (ap4-1)</i>            | DN305431         | NA                                    | NA                                      |
| <i>Smed-activating enhancer binding protein-like-4.2 (ap4-2)</i>            | HO007476         | NA                                    | NA                                      |
| <i>Smed-aryl hydrocarbon receptor (ahr)</i>                                 | KF487107         | CATTACCATCCCGCCGACACAGGAATCAACTG      |                                         |
| <i>Smed-aryl hydrocarbon receptor nuclear translocator (arnt)</i>           | KF487108         | CATTACCATCCCGCCGATAGAGACCAAGAGCAAATAG |                                         |
| <i>Smed-atonal homolog (atoh)</i>                                           | Sequence Below   | CCGCTCGAGAAACAACCCAGCCGACTCAAC        | ATAAGAATGCGGCCCGCTTGTAGCCATTAATAGAGTTTC |
| <i>Smed-atonal homolog 8-1 (atoh8-1)</i>                                    | DN306140         | NA                                    | NA                                      |
| <i>Smed-atonal homolog 8-2 (atoh8-2)</i>                                    | HO006843         | NA                                    | NA                                      |
| <i>Smed-basic helix-loop-helix family, member e22/23-like (e22/23)</i>      | KF487092         | CCGCTCGAGAGACTGTTCGGCTCGAC            | ATAAGAATGCGGCCGCTGCGACATAAAATACAAATTGC  |
| <i>Smed-collier (coe)</i>                                                   | KF487109         | CATTACCATCCCGCGTTTGAACCATGCTTCG       |                                         |
| <i>Smed-daughterless (da)</i>                                               | KF487093         | CCGCTCGAGCGAAGAGCAGACAACAGCAC         | ATAAGAATGCGGCCGCTTTTACCAACACCCGATTGC    |
| <i>Smed-fer3l-1 (fer3l-1)</i>                                               | KF487094         | CCGCTCGAGTTAAGTCAAATCAGGAACCTC        | ATAAGAATGCGGCCGCTGCGTTCAAAGTTCAGTC      |
| <i>Smed-fer3l-2 (fer3l-2)</i>                                               | KF487095         | CCGCTCGAGATTTCGACTGAAATGACTGAAATC     | ATAAGAATGCGGCCGCAACCCGCAATGTTTCAATTC    |
| <i>Smed-fer3l-3 (fer3l-3)</i>                                               | KF487096         | CCGCTCGAGAGAAACCCAGCCATTTTTTC         | ATAAGAATGCGGCCGCAATTTGTCGATCATTTTTTCAGG |
| <i>Smed-hairy and enhancer of split like-1 (hesl-1)</i>                     | KF487110         | CATTACCATCCCGGAAATGGAAAGACGACGAAGGGCG |                                         |
| <i>Smed-hairy and enhancer of split like-2 (hesl-2)</i>                     | KF487111         | CATTACCATCCCGTCGCGCAGAGATAAATTTCCG    |                                         |
| <i>Smed-hairy and enhancer of split like-3 (hesl-3)</i>                     | KF487112         | CATTACCATCCCGCTTGAGCCAGATCAATATCACAGC |                                         |
| <i>Smed-helix-loop-helix 1 (hlh1)</i>                                       | KF487113         | CATTACCATCCCGGATGAATCGTGGTCGAAATGAGC  |                                         |
| <i>Smed-inhibitor of DNA binding 4 (id4)</i>                                | KF487114         | CATTACCATCCCGAAACTCGTTCACAGATTCC      |                                         |
| <i>Smed-max-interactor-1 (mxi-1)</i>                                        | KF487115         | CATTACCATCCCGAGATTCCGTACCCGTGCGAATTC  |                                         |
| <i>Smed-max-interactor-2 (mxi-2)</i>                                        | KF487116         | CATTACCATCCCGACCTGGAAAGGATCAGAAITGGAC |                                         |
| <i>Smed-max-like protein x (mlx)</i>                                        | HO006087         | NA                                    | NA                                      |
| <i>Smed-microphthalmia-associated transcription factor like-1 (mitf1-1)</i> | KF487117         | CATTACCATCCCGCGCACTCGAAAGCAATATC      |                                         |
| <i>Smed-microphthalmia-associated transcription factor like-2 (mitf1-2)</i> | KF487118         | CATTACCATCCCGTGAAGTCTCGCACAAATGCTCAAC |                                         |
| <i>Smed-microphthalmia-associated transcription factor like-3 (mitf1-3)</i> | KF487119         | CATTACCATCCCGTAAACACGACGAGATCACACAGTC |                                         |
| <i>Smed-mlx interacting protein-like (mxipl)</i>                            | KF487097         | CCGCTCGAGAGTTTCGGGACAGTCGTTTC         | ATAAGAATGCGGCCGCGCACGGGTTTATTTGTTGCTG   |
| <i>Smed-musculin</i>                                                        | KF487098         | CCGCTCGAGAAACGTCGTGGTCGTAACC          | ATAAGAATGCGGCCGCGCTCCAGGAACTAATGACATCG  |
| <i>Smed-MYC associated factor X (max)</i>                                   | DN308448         | NA                                    | NA                                      |
| <i>Smed-myogenic differentiation (myoD)</i>                                 | KF487099         | CCGCTCGAGTTTCCAGTTTCCACTTGTCC         | ATAAGAATGCGGCCGCTCCTAGTCTCGGGAGTTTG     |
| <i>Smed-neurogenic differentiation-1 (neuroD-1)</i>                         | DN305764         | NA                                    | NA                                      |
| <i>Smed-neurogenic differentiation-2 (neuroD-2)</i>                         | KF487120         | CATTACCATCCCGGATTAGGGAAACTATTGC       |                                         |
| <i>Smed-oligodendrocyte lineage transcription factor 2 (olig2)</i>          | KF487100         | CCGCTCGAGACCTGAATTCGGCATTGGAC         | ATAAGAATGCGGCCGCCCAATAGGAAACTTTTCAAG    |
| <i>Smed-pancreas specific transcription factor-1 (ptf-1)</i>                | KF487101         | CCGCTCGAGAGCCGCAACATGAGAGAAC          | ATAAGAATGCGGCCGCGCCAAAGAATAAGGCAGATGG   |
| <i>Smed-pancreas specific transcription factor-2 (ptf-2)</i>                | KF487102         | CCGCTCGAGCTGATGGAGCCTTTCGGATT         | ATAAGAATGCGGCCGCTCATTTCTTCAACAACACGA    |
| <i>Smed-pancreas specific transcription factor-3 (ptf-3)</i>                | KF487103         | CCGCTCGAGCGTTACTTATCAAATCCTTCTACG     | ATAAGAATGCGGCCGCAATGCTGTCTGGGTTTCC      |
| <i>Smed-pancreas specific transcription factor-4 (ptf-4)</i>                | KF487104         | CCGCTCGAGCACTTTCGATTCGTGATAACAG       | ATAAGAATGCGGCCGCTCGGTTCCCTGATATTCCTC    |
| <i>Smed-pancreas specific transcription factor-5 (ptf-5)</i>                | DN303577         | NA                                    | NA                                      |
| <i>Smed-single minded (sim)</i>                                             | KF487121         | CATTACCATCCCGCGCTTATATTGACTGACATCG    |                                         |
| <i>Smed-sterol regulatory element binding transcription factor (srebp)</i>  | KF487122         | CATTACCATCCCGAAATTCCTCCACCAATGAAC     |                                         |
| <i>Smed-T-cell acute lymphocytic leukemia (tal)</i>                         | KF487105         | CCGCTCGAGTTGTAGGAAACCAATCTCAACG       | ATAAGAATGCGGCCGCTTCAAGATTTCTTCCAGAATCC  |
| <i>Smed-transcription factor 15 (tcf15)</i>                                 | AFD29618         | NA                                    | NA                                      |
| <i>Smed-twist</i>                                                           | KF487106         | CCGCTCGAGCAAGAAAGAACAGAATCATAITTTGG   | ATAAGAATGCGGCCGCCCAAGCTCCTTCCATTTCTC    |
| <i>Smed-upstream transcription factor (usf)</i>                             | KF487123         | CATTACCATCCCGTGTTCGATTTGTTCCCGTG      |                                         |

Other Clones

| Gene Name          | Accession Number |
|--------------------|------------------|
| <i>Smed-agat-1</i> | DN290976         |
| <i>Smed-ChAT</i>   | FG310880         |
| <i>Smed-cpp-1</i>  | BK007012         |
| <i>Smed-gpas</i>   | HQ121519         |
| <i>Smed-h2b</i>    | DN298006         |
| <i>Smed-npp-4</i>  | BK007037         |
| <i>Smed-npy-2</i>  | BK007019         |
| <i>Smedwi-1</i>    | DN309285         |
| <i>NB.32.1g</i>    | DN298711         |
| <i>Smed-pc2</i>    | BK007043         |

qPCR Primers

| Target                | Forward Primer          | Reverse Primer        |
|-----------------------|-------------------------|-----------------------|
| <i>Smed-β-tubulin</i> | TGGCTGCTTGTGATCCAAGA    | AAATGCCGCAACAGTCAAATA |
| <i>Smed-ascl-1</i>    | TTCAATACCCCTTCAATCAIG   | TGCAGTCGTAACCCGATTTC  |
| <i>Smed-ascl-2</i>    | TTTCAATACCCAGTTCCTTTTC  | CGTTCTTTTATTGCGTCTC   |
| <i>Smed-coe</i>       | CTGCAACGCTGGATCAACTA    | TGGCTGATGCTTCTTCTT    |
| <i>Smed-e22/23</i>    | CGTATGCTCACAGTCCATCG    | ATATCTCGGGACTGGAACC   |
| <i>Smed-hesl-3</i>    | CAAAACCAAGCCGATTCATTATC | TCCGAATGTTTGTTCGGATAC |
| <i>Smed-neuroD-1</i>  | CTCTAATCAAACCCGGCAAG    | ATGGAAATGGACCTTGGATG  |
| <i>Smed-sim</i>       | AGTCGAATTAACCCGCAATAG   | GCTTGGTACTGGTATGGTAAG |

>*Smed-atonal homolog (atoh)*

AAACAACCAAGCCGACTCAACTACCAAATCGAATCTATCAAACGGACCGCAGCCAACGACAGAGAACAAGCAATGTATTGTTTGAACCGAGCCTTGACCAACTGAGAGATGCTGTTCTTACTCTTCTAATCAAAGAAAATGTCAAAGTTTGAACCTCTAATATGGCTCAAACG
